# Supplementary material for: Fabrication of gold/polypyrrole core/shell nanowires on a flexible substrate for molecular imprinted electrochemical sensors
Source: Royal Society of Chemistry journal article supplement (doi:10.1039/c4ra11774c), 2014-01-01
Supplement: c4ra11774c1.pdf [file c4ra11774c1.pdf]

**Electronic Supplementary Information**  
**Fabrication of Gold/Polypyrrole Core/Shell Nanowires on**  
**Flexible Substrate for Molecular Imprinted**  
**Electrochemical Sensor**

Wei-Ren Huang,<sup>a</sup> Yu-Liang Chen <sup>a</sup>, Chi-Young Lee<sup>b</sup> and Hsin-Tien Chiu<sup>\*a</sup>

*<sup>a</sup>Department of Applied Chemistry, National Chiao Tung University, Hsinchu, Taiwan 30010,  
R. O. C.*

*E-mail: htchiu@nctu.edu.tw*

*<sup>b</sup>Department of Materials Science and Engineering, National Tsing Hua University, Hsinchu,  
Taiwan 30013, R. O. C.*

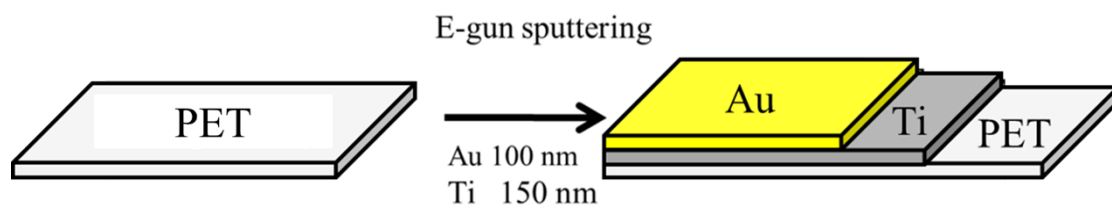

**Figure S1.** Fabrication of Au and Ti layers on a flexible PET substrate.

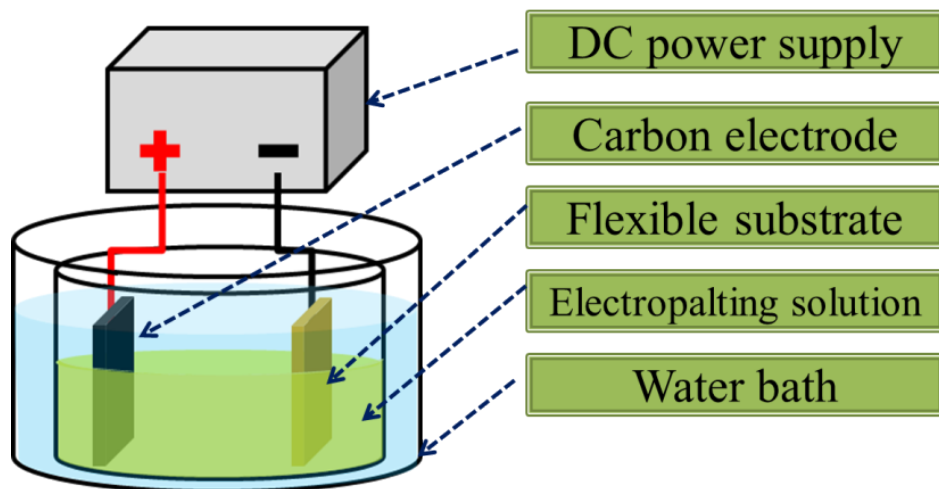

**Figure S2.** Two-electrode electrochemical deposition system for Au nanowire growth.

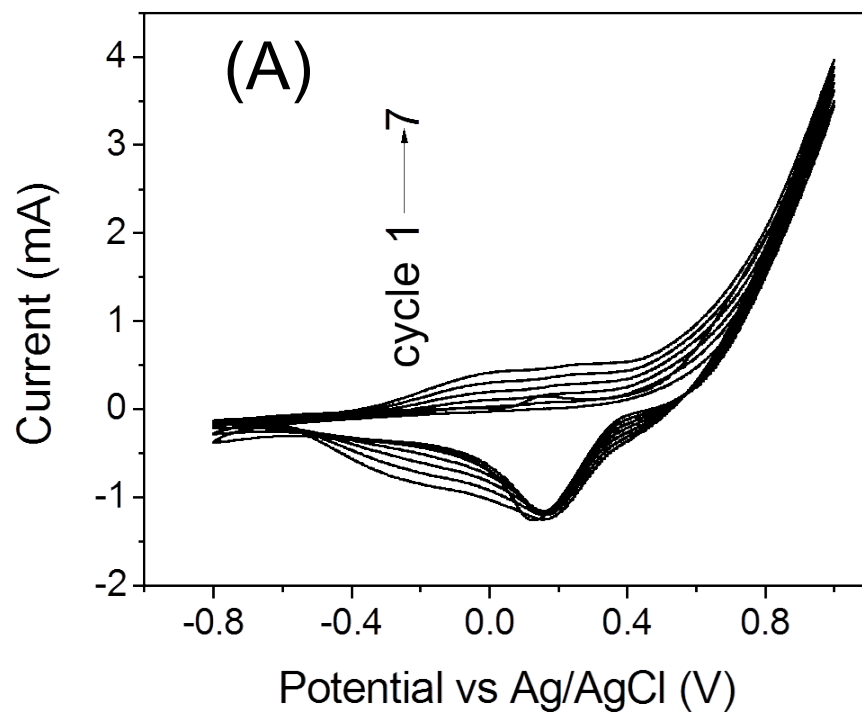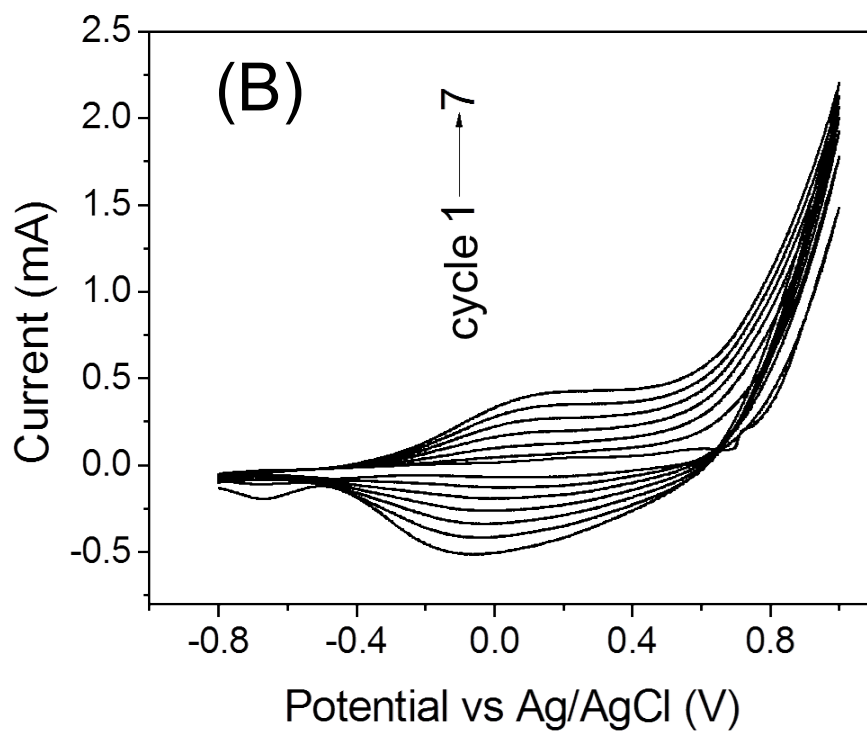

**Figure S3.** CV scans (7 cycles,  $500 \text{ mV s}^{-1}$ ) in pyrrole<sub>(aq)</sub> (0.05 M), NaClO<sub>4(aq)</sub> (0.1 M), for the fabrications of (A) APPW500 in DA<sub>(aq)</sub> (0.02 M) and (B) APPW500N without DA<sub>(aq)</sub>.

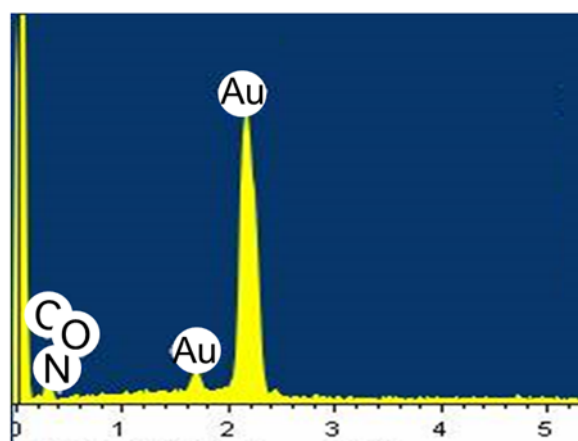

**Figure S4.** EDS spectrum of Au NWs on PET.

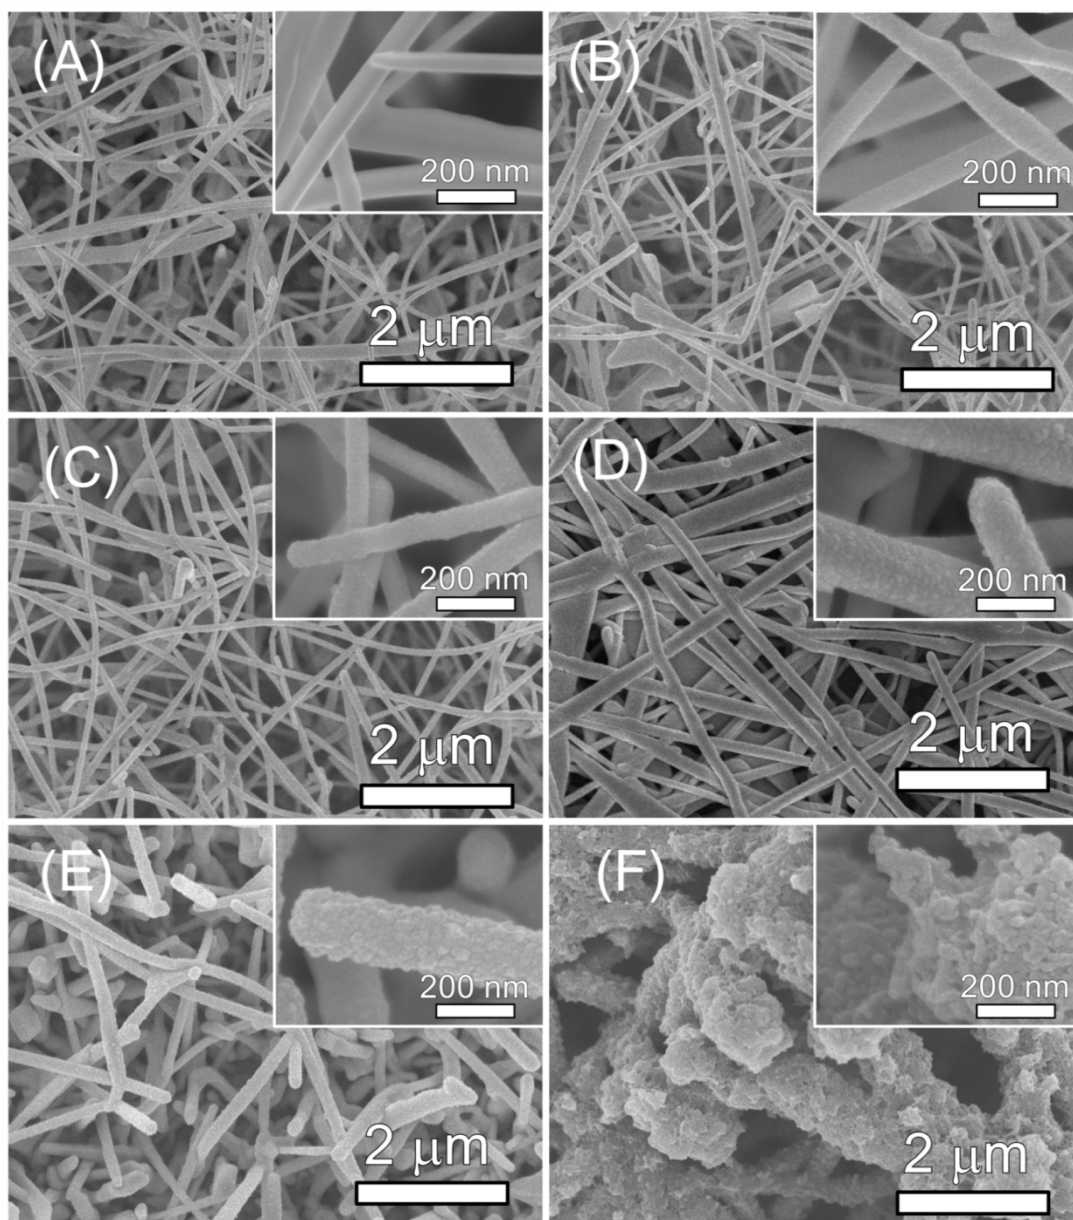

**Figure S5.** Low and high magnification (inset) SEM images of (A) Au NWs, (B) APPW900, (C) APPW700, (D) APPW500, (E) APPW300, and (F) APPW100.

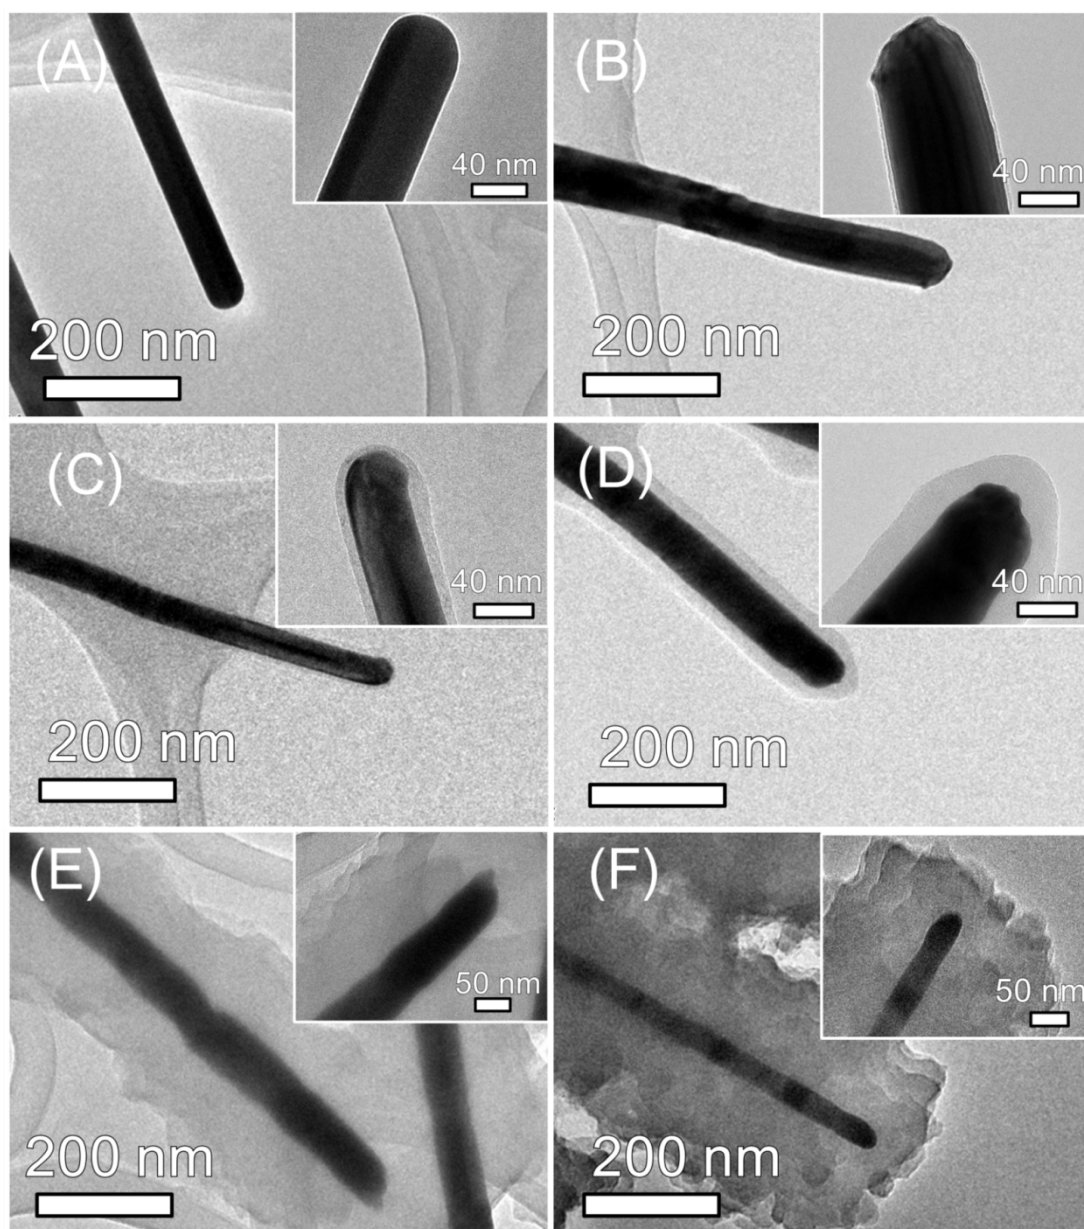

**Figure S6.** Low and high magnification (inset) TEM images of (A) Au NWs, (B) APPW900, (C) APPW700, (D) APPW500, (E) APPW300, and (F) APPW100.

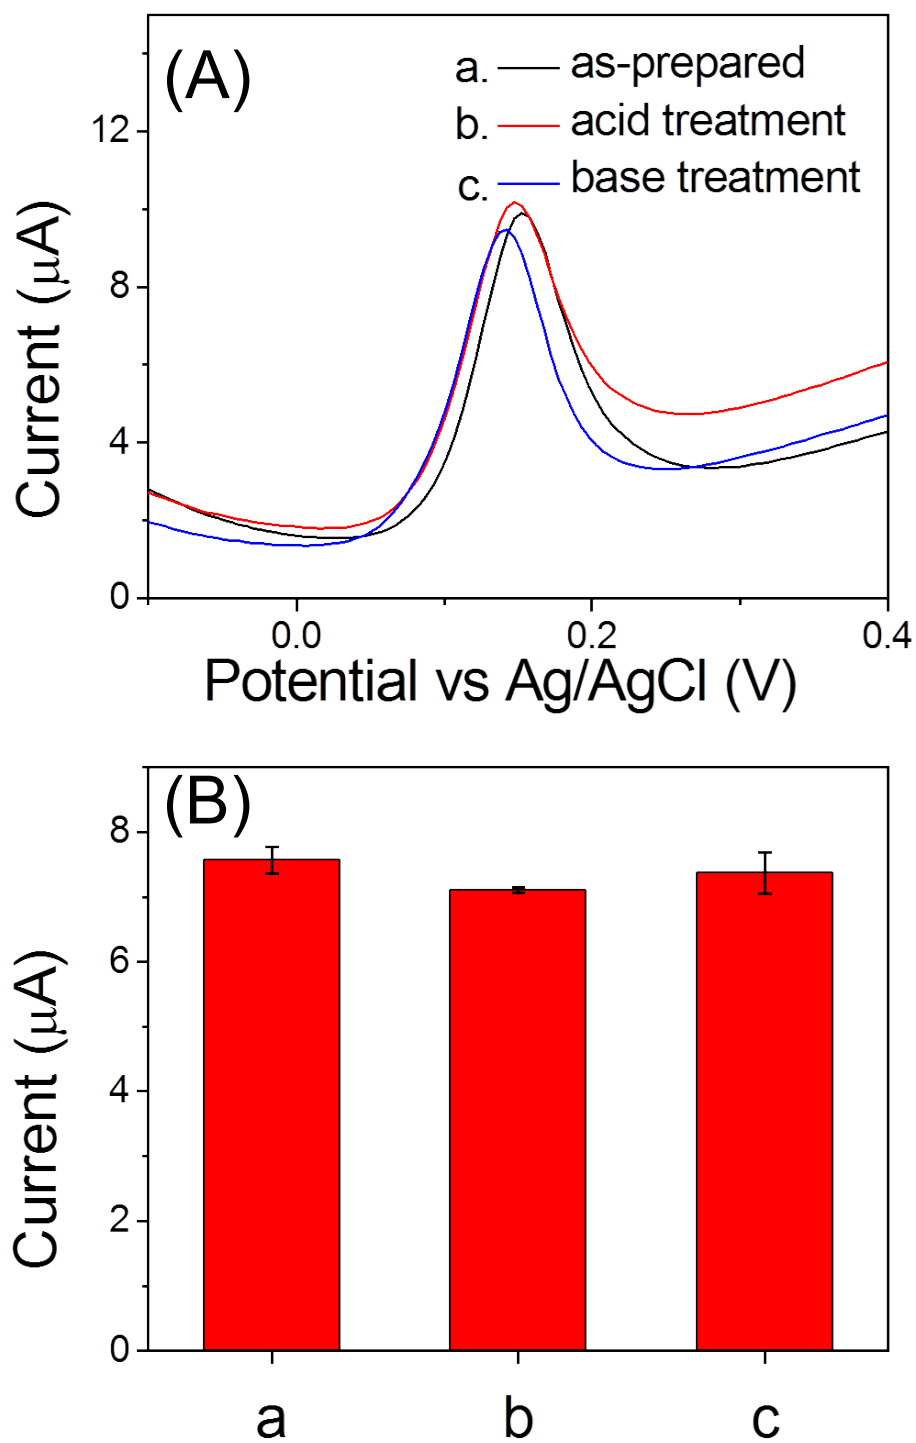

**Figure S7.** (A) Plots of DPV responses for DA (10<sup>-5</sup> M) detection by an APPW500 electrode after sequential acid and base treatments. (a) As-prepared, (b) after acid treatment (in H<sub>2</sub>SO<sub>4(aq)</sub> (1M) for 10 min), and (c) after base treatment (in NaOH<sub>(aq)</sub> (1M) for 10 min). (B) Signal intensities of the DPV signals in (A).



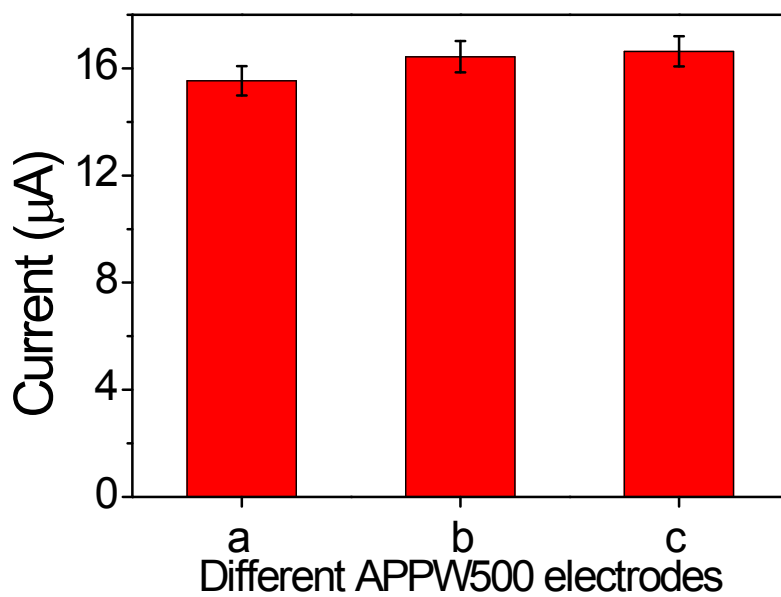

**Figure S8.** Signal intensities of the DPV signals of DA ( $10^{-4}$ M) detected by APPW electrodes (fabricated in pyrrole<sub>(aq)</sub> (0.05 M), NaClO<sub>4(aq)</sub> (0.1 M), DA<sub>(aq)</sub> (0.02 M), 7 CV scans, scan rate  $500 \text{ mV s}^{-1}$ ) 2 and 6 days after the fabrication. The data are the electrodes (a) 2 days, (b) 2 days, and (c) 6 days after the fabrication.
